# Supplementary material
Source: publisher figshare collection journal article supplement (https://acs.figshare.com/ndownloader/files/4150705)
Supplement: Supplementary file 1 [file 4150705]

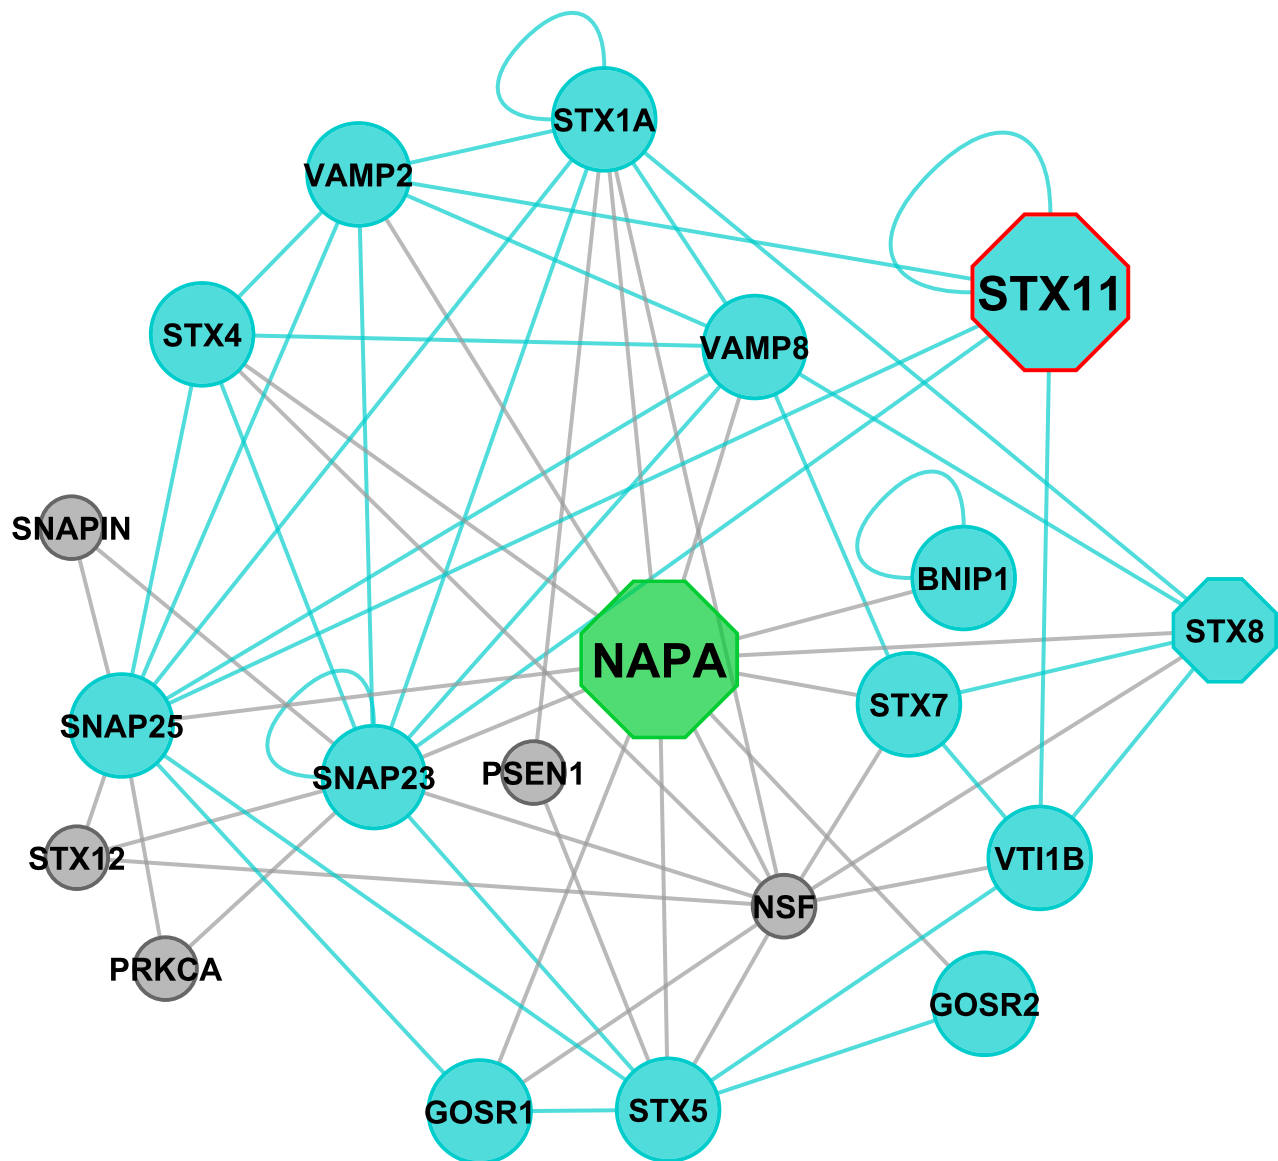

-  Increased abundance (>1.8-fold) in PA28γ<sup>-/-</sup>/CoreTGvsWT
-  KEGG Pathway "SNARE interactions in vesicular transport"
-  Decreased abundance (>1.8-fold) in PA28γ<sup>-/-</sup>/CoreTGvsWT
-  Altered abundance in CoreTGvsWT but not PA28γ<sup>-/-</sup>/CoreTGvsWT
-  Others

Figure S1
